# Supplementary material for: Ag-Hybridized plasmonic Au-triangular nanoplates: highly sensitive photoacoustic/Raman evaluation and improved antibacterial/photothermal combination therapy
Source: Royal Society of Chemistry journal article supplement (doi:10.1039/c8tb00617b), 2018-01-01
Supplement: c8tb00617b1.pdf [file c8tb00617b1.pdf]

**Electronic Supporting Information**

**Ag-hybridized plasmonic Au-triangular nanoplates: highly sensitive  
photoacoustic/Raman evaluation and improved antibacterial/photothermal  
combination therapy**

Ya Peng,<sup>a</sup> Yu Liu,<sup>a</sup> Xiaolin Lu,<sup>b</sup> Shouju Wang,<sup>c</sup> Maomao Chen,<sup>a</sup> Wenchao Huang,<sup>a</sup> Zhiyou Wu,<sup>a</sup> Guangming Lu,<sup>c</sup>  
and Liming Nie<sup>a,\*</sup>

<sup>a</sup>State Key Laboratory of Molecular Vaccinology and Molecular Diagnosis & Center for Molecular Imaging and Translational Medicine, School of Public Health, Xiamen University, Xiamen, 361102, China.

<sup>b</sup>Department of Orthopaedics, the First Affiliated Hospital, Shantou University Medical College, Shantou, 515041, China.

<sup>c</sup>Department of Medical Imaging, Jinling Hospital, School of Medicine, Nanjing University, Nanjing, 210002, China.

\*Corresponding author: [nielm@xmu.edu.cn](mailto:nielm@xmu.edu.cn)

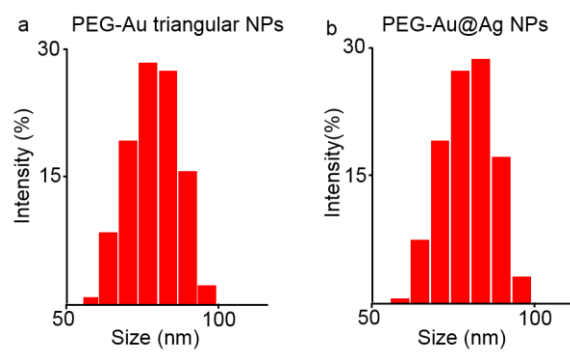

**Fig. S1.** Size distribution of (a) PEG-Au triangular NPs and (b) PEG-Au@Ag NPs.

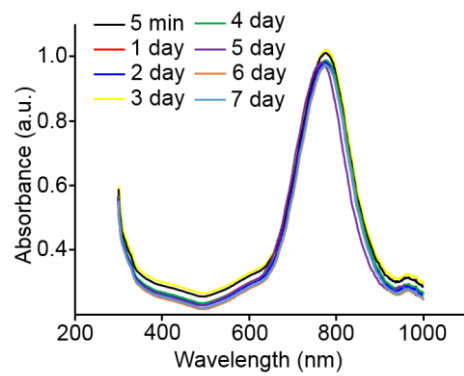

**Fig. S2.** Stability of PEG-Au@Ag NPs exposed in the air up to 7 days.

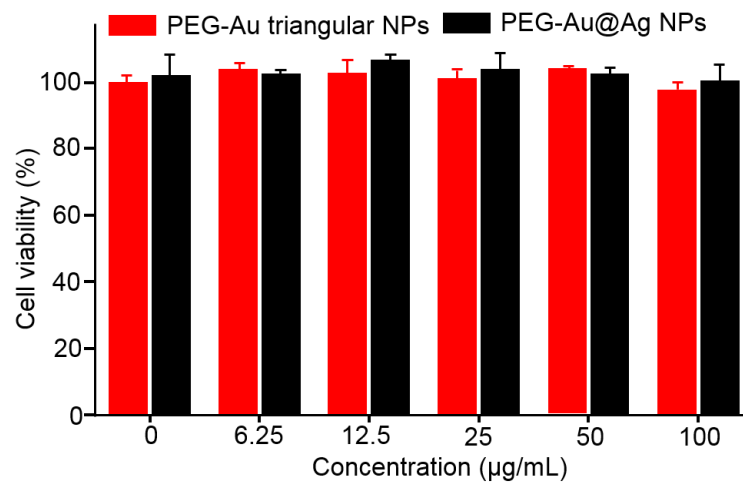

**Fig. S3.** Cell viability of MGC 803 cells co-cultured with PEG-Au triangular NPs and PEG-Au@Ag NPs at different concentrations for 24 h.

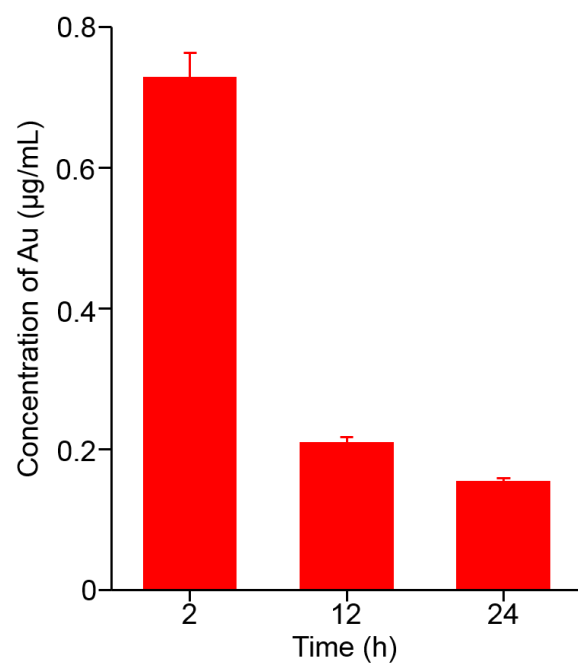

**Fig. S4.** Blood clearance of Au post-injection for 2 h, 12 h, and 24 h (n=7).

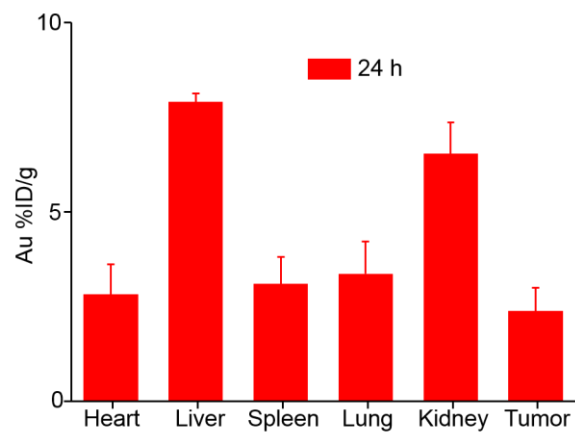

**Fig. S5.** Pharmacokinetics of PEG-Au@Ag NPs from inductively coupled plasma mass spectrometry (ICP-MS) post-injection for 24 h (200  $\mu$ L, 1 mg/kg) (n = 7).

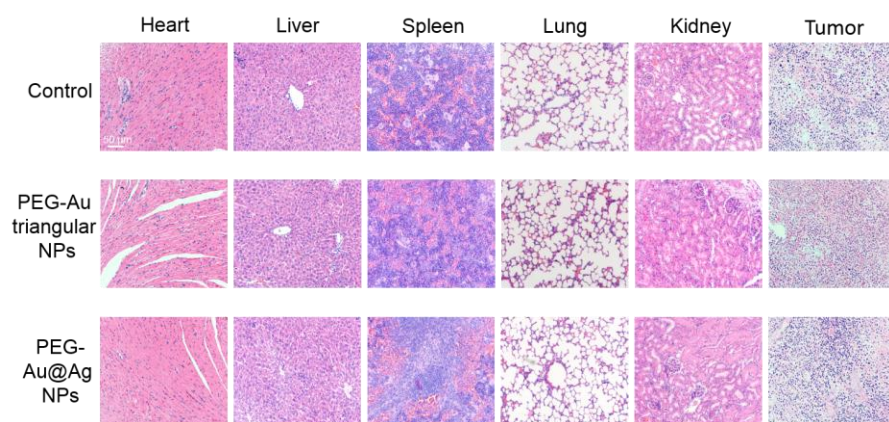

**Fig. S6.** H&E stained images of heart, liver, spleen, lung, kidney, and tumor through dissecting the mice in 7 day after i.v. injection of PBS, PEG-Au triangular NPs, and PEG-Au@Ag NPs (200  $\mu$ L, 1 mg/kg). The scale bar is 50  $\mu$ m.

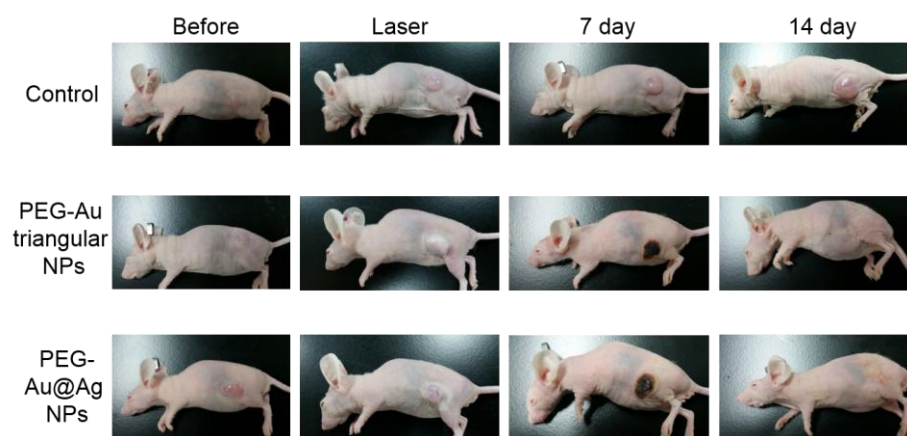

**Fig. S7.** Tumor changes of MGC 803 tumor-bearing mice injected with PBS, PEG-Au triangular NPs, and PEG-Au@Ag NPs (200  $\mu$ L, 1 mg/kg) and followed by 808 nm laser irradiation (1 W/cm<sup>2</sup>, 5 min).



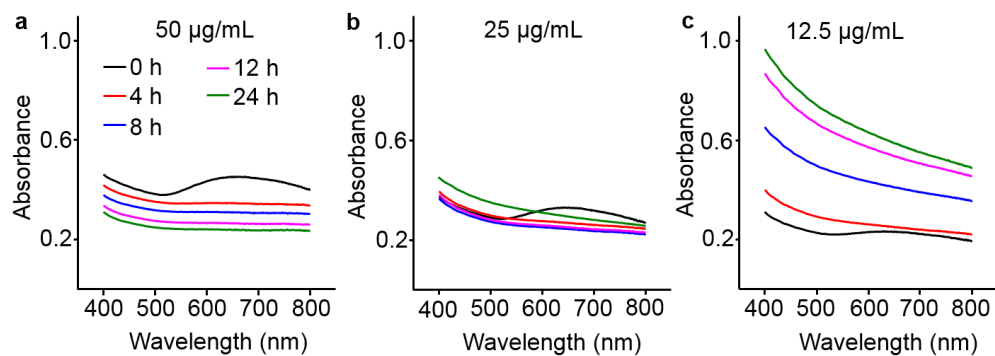

**Fig. S8.** Typical UV-vis spectra of PEG-Au triangular NPs and PEG-Au@Ag NPs-treated *E. coli* bacteria at different time points with the concentrations of (a) 50, (b) 25, and (c) 12.5  $\mu\text{g/mL}$ .

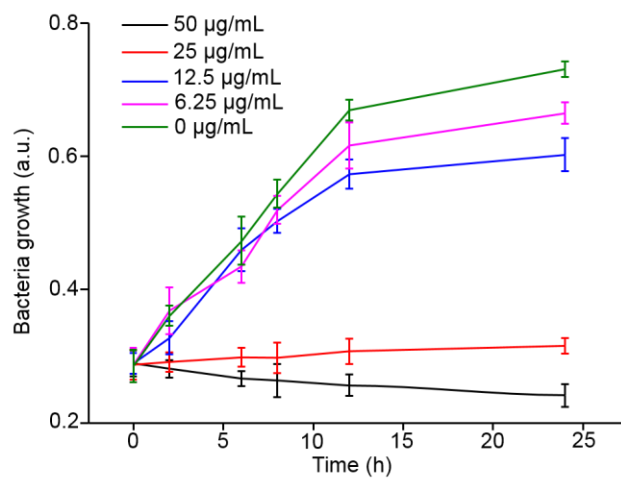

**Fig. S9.** The bacteria growth amount co-cultured with the PEG-Au@Ag NPs at different concentrations.

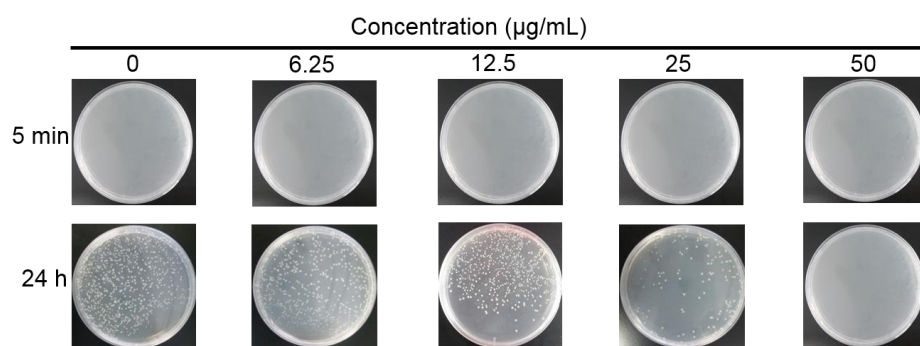

**Fig. S10.** The bacterial colonies co-cultured 5 min and 24 h with PEG-Au@Ag NPs at different concentrations.
